# Supplementary material for: AmpliconReconstructor integrates NGS and optical mapping to resolve the complex structures of focal amplifications
Source: PubMed Central journal article supplement (PMC7463033; doi:10.1038/s41467-020-18099-z), 2020-09-01
Supplement: 41467_2020_18099_MOESM3_ESM.pdf [file 41467_2020_18099_MOESM3_ESM.pdf]

## **Description of Additional Supplementary Files**

**File Name:** Supplementary Data 1

**Description:** SRA accession numbers used for WGS data, OM molecule length statistics and OM assembly statistics for cell lines in this study.

**File Name:** Supplementary Data 2

**Description:** AR performance on simulated data. Includes comparison of SegAligner and other OM alignment methods, amplicon mixture performance, false graph edge performance, profile of simulated amplicons, and performance on *de novo* simulated amplicons.

**File Name:** Supplementary Data 3

**Description:** Focal amplification breakpoints identified in both AR and AA for cell lines in this study and estimated integration point locations for focal amplifications.

**File Name:** Supplementary Data 4

**Description:** AR amplicon reconstruction paths and summary statistics about AR reconstructions for cell lines in this study.

**File Name:** Supplementary Data 5

**Description:** Default parameters for AR and SegAligner.
